# Supplementary material for: Cell Organisation in the Colonic Crypt: A Theoretical Comparison of the Pedigree and Niche Concepts
Source: PubMed Central journal article supplement (PMC3771985; doi:10.1371/journal.pone.0073204), 2013-09-12
Supplement: pone.0073204.s007.pdf [file pone.0073204.s007.pdf]

## Supporting Text S1

### Cell organisation in the colonic crypt: a theoretical comparison of the pedigree and niche concepts.

Richard C. van der Wath<sup>1,\*</sup>, Bruce S. Gardiner<sup>1</sup>, Antony W. Burgess<sup>2,3</sup>, David W. Smith<sup>1</sup>

**1 Engineering Computational Biology Group, School of Computer Science and Software Engineering, University of Western Australia, Perth, Australia**

**2 Ludwig Institute for Cancer Research, Royal Melbourne Hospital, Parkville, Victoria 3052 Australia**

**3 The Walter and Eliza Hall Institute of Medical Research, 1G Royal Parade, Parkville, Victoria 3052 Australia**

\* E-mail: rvanderwath@gmail.com

## Ordinary Differential Equation Model

A very useful feature of the pedigree model is that it can be readily described by a system of linear Ordinary Differential Equations (ODEs). The rate of change in cell numbers for each cell population<sup>1</sup> is determined and when solved at steady state, gives an expression to estimate the stem cell division rate - an unknown quantity.

The ODE version of the pedigree model are given by the following equations:

$$\begin{aligned}
 S(t) &= s \\
 \dot{T}_1(t) &= \alpha_S S - \alpha_{T_1} T_1 \\
 \dot{T}_2(t) &= 2\alpha_{T_1} T_1 - \alpha_{T_2} T_2 \\
 \dot{T}_3(t) &= 2\alpha_{T_2} T_2 - \alpha_{T_3} T_3 \\
 &\vdots \\
 \dot{T}_n(t) &= 2\alpha_{T_{n-1}} T_{n-1} - \alpha_{T_n} T_n \\
 \dot{Z}(t) &= 2\alpha_{T_n} T_n - \gamma Z,
 \end{aligned} \tag{S1}$$

where  $S(t) = s$  gives the constant number of stem cells,  $T_i(t)$  gives the number of  $i^{\text{th}}$  generation TA cells at time  $t$ , and  $Z(t)$  gives the number of mature cells at time  $t$ . Cell division rates (average rate of the whole cell cycle) for stem cells and TA cells are given by  $\alpha_S$  and  $\alpha_{T_i}$  respectively.

---

<sup>1</sup>Cell population here refers to either stem cells, different TA cell generations, or mature cells.

The steady state solution of the system in S1 are given by

$$\begin{aligned}
S^* &= s \\
T_1^* &= \frac{\alpha_S}{\alpha_{T_1}} S^* \\
T_2^* &= \frac{2\alpha_{T_1}}{\alpha_{T_2}} T_1^* \\
T_3^* &= \frac{2\alpha_{T_2}}{\alpha_{T_3}} T_2^* \\
&\vdots \\
T_n^* &= \frac{2\alpha_{T_{n-1}}}{\alpha_{T_n}} T_{n-1}^* \\
Z^* &= \frac{2\alpha_{T_n}}{\gamma} T_n^*.
\end{aligned} \tag{S2}$$

The expression for the steady state mature cell population can be simplified to  $Z^* = 2^n \frac{\alpha_S}{\gamma} s$ . Interestingly this expression is independent of the transit amplifying cell division rates (even when they are different between TA cell generations) but strongly depends on  $n$  the number of amplifying generations.

We can also derive an expression for the total number of cells at steady state, by simply adding up the individual steady state populations:

$$\begin{aligned}
\text{Total} &= S^* + T_1^* + \dots + T_n^* + Z^* \\
&= s + \frac{\alpha_S}{\alpha_{T_1}} S^* + \frac{2\alpha_{T_1}}{\alpha_{T_2}} T_1^* + \dots + \frac{2\alpha_{T_n}}{\gamma} T_n^* \\
&= s + 2^0 \frac{\alpha_S}{\alpha_{T_1}} s + 2^1 \frac{\alpha_S}{\alpha_{T_2}} s + \dots + 2^{n-1} \frac{\alpha_S}{\alpha_{T_n}} s + 2^n \frac{\alpha_S}{\gamma} s \\
&= s \left( 1 + \alpha_S \left[ 2^0 \frac{1}{\alpha_{T_1}} + \dots + 2^{n-1} \frac{1}{\alpha_{T_n}} + 2^n \frac{1}{\gamma} \right] \right).
\end{aligned} \tag{S3}$$

It is often assumed that TA cell generations have a homogeneous division rate, that is  $\alpha_T \equiv \alpha_{T_1} = \alpha_{T_2} = \dots = \alpha_{T_n}$ . If this is the case the expression for the total cell population simplifies to

$$\begin{aligned}
\text{Total} &= s \left( 1 + \frac{\alpha_S}{\alpha_T} [2^0 + 2^1 + \dots + 2^{n-1}] + \frac{\alpha_S}{\gamma} 2^n \right) \\
&= s \left( 1 + \frac{\alpha_S}{\alpha_T} (2^n - 1) + \frac{\alpha_S}{\gamma} 2^n \right).
\end{aligned} \tag{S4}$$

Reorganising gives us the expression for estimating  $\alpha_S$ , the stem cell division rate:

$$\alpha_S = \frac{\text{Total} \cdot \alpha_T \cdot \gamma - s \cdot \alpha_T \cdot \gamma}{s \cdot \gamma \cdot 2^n - s \cdot \gamma + s \cdot \alpha_T \cdot 2^n}. \tag{S5}$$
